# Supplementary material
Source: HighWire-hosted journal article supplement (https://ez-admanager.com/highwire/filestream/136438/field_highwire_adjunct_files/0/birbeck_1272.pdf)
Supplement: birbeck_1272.pdf [file birbeck_1272.pdf]

# Virus Zika

## Lo que el neurólogo quiere saber

Gretchen L. Birbeck,  
MD, MPH, DTMH

Correspondencia a  
Dr. Birbeck:  
gretchen\_birbeck@urmc.  
rochester.edu

*Neurology*® 2016;86:1272–1274

Mientras *Neurology*® Sin Fronteras aparecía en enero pasado, las noticias cubriendo la epidemia de virus Zika en América Latina, con Brasil como base, alcanzaron la prensa popular.<sup>1-4</sup> Las fotografías de padres devastados y niños microcefálicos y dismórficos han capturado la atención del público. Artículos recientes en el *New England Journal of Medicine*<sup>5</sup> y *Lancet*<sup>6-8</sup> entre otras, han descripto algo de la epidemiología de este arbovirus, y cómo se cree que llegó desde África (identificado en 1947) al Sudeste Asiático (mediados del siglo XX) a Micronesia (2007) a la Polinesia Francesa (2014) y más recientemente a América Latina en 2015.<sup>9</sup>

La llegada del virus Zika a un clima tropical con varios mosquitos vectores y grandes poblaciones de individuos no inmunes, muchos de los cuales viven hacinados, en espacios urbanos sin aire acondicionado o protectores para limitar la exposición a las picaduras diurnas del agresivo y doméstico *Aedes*, ha resultado en ≈500.000 infecciones desde abril de 2015.<sup>10</sup> La sospecha clínica de una epidemia de microcefalia en Brasil y 2 casos de Zika diagnosticados por RT-PCR en neonatos microcefálicos llevó a la iniciación de un registro de microcefalia incidental con ≈4000 casos reportados en los últimos 9 meses. Los oficiales son cuidadosos para apuntar que la causalidad no ha sido establecida definitivamente, a pesar de que se detectó virus Zika en el líquido amniótico y el tejido cerebral fetal de algunos de los fetos afectados. El rol, si hay alguno, de los brotes coincidentes de dengue y Chikungunya permanece poco claro. ¿Entonces qué hay que saber sobre el impacto del Zika en el sistema nervioso?

**NEUROBIOLOGÍA Ciencia básica.** El Zika fue identificado primero en 1947 en el Bosque Zika (que significa “superficie”) de Uganda en monos Rhesus durante una investigación de fiebre amarilla. Los reportes iniciales del Zika fueron publicados en el *Transactions of the Royal Society of Tropical Medicine & Hygiene* en 1952 y la *Royal Society* puso estos artículos completos gratuitos en línea hasta el 29 de febrero de 2016.<sup>11</sup> Este trabajo temprano delineaba claramente el tropismo del virus hacia el cerebro en ratones infectados intraperitonealmente, con el traspaso del virus de la barrera hemato-encefálica e infectando tanto las neuronas como la glía. Las inclusiones intracitoplasmáticas, que fueron luego referidas como productos del virus, ahora se conocen

como resultado de la alteración del virus del proceso de autofagia para su propia replicación.<sup>12-14</sup> Otro mecanismo potencial de las anomalías del neurodesarrollo asociadas con el Zika es la amplificación de los centrosomas debido al rol dual de algunas proteínas en la autofagia y la estabilidad centrosomal. En ratones, un número aumentado de centrosomas causa un retraso en la mitosis, aumenta la apoptosis, la desorientación de las células madre neurales, la diferenciación prematura neuronal y un reducido número de células progenitoras –todo lo cual puede resultar en microcefalia.<sup>15</sup>

**Hallazgos clínicos.** Estudios previos del Zika en África y el sudeste asiático lo caracterizan como un virus endémico que causa infecciones auto-limitadas con fiebre, mialgias, artralgias, rash maculopapular y conjuntivitis, que afecta en gran medida a niños, con un 80% de infecciones asintomáticas.<sup>12</sup> Cuando el Zika se extendió a la Polinesia Francesa en 2007 en conjunto con la aparición del dengue, los reportes de fenómenos neurológicos y autoinmunes empezaron a aparecer. La incidencia de síndrome de Guillain Barre (SGB) llegó a ser de 20 veces más que lo esperado en base al tamaño de la población, y una revisión retrospectiva sugirió un aumento de similar magnitud en las anomalías neurológicas fetales en niños nacidos en 2014-2015.<sup>16</sup> Un reporte del *European Centre for Disease Prevention and Control* indica que, además de aumentar el número de casos de SGB, también se pensó que el Zika estaría asociado con encefalitis, meningoencefalitis, parálisis facial y mielitis.<sup>17</sup>

**MANEJO CLÍNICO** No se requiere LCR para el diagnóstico, pero el diagnóstico definitivo puede ser un desafío. La RT-PCR puede solo ser positiva durante la viremia activa, que es breve y se extiende durante el 3er-5to día post infección. La inmunoglobulina M (IgM) y los niveles neutralizantes de anticuerpos son bajos al principio de la enfermedad y pueden tener una reacción cruzada con el dengue, al igual que la prueba de neutralización por reducción de placas (PRNT). No hay vacuna y el tratamiento está limitado al cuidado de sostén con un importante aviso de que la aspirina y las drogas anti-inflamatorias no esteroideas deben ser evitadas en la infección por Zika debido a la frecuente coinfección con dengue y la dificultad de distinguir

Del School of Medicine and Dentistry, University of Rochester, NY.

Ir a [Neurology.org](http://Neurology.org) para declaraciones de intereses completas. La información sobre fondos y aquellas declaraciones relevantes para los autores, si existiesen, se encuentran al final de la editorial.

las 2 infecciones –estas medicaciones son evitadas en el dengue debido al riesgo aumentado de sangrado asociado a su uso.<sup>10</sup>

La ecografía puede diagnosticar la infección fetal de Zika a las 18-20 semanas de gestación. Los hallazgos clave más allá de la microcefalia (circunferencia occipito frontal < al percentilo 3 para la edad, sexo y edad gestacional) son las calcificaciones intracraneales e intraoculares, la disgenesia del cuerpo calloso y vermis, la megacisterna magna, la ventriculomegalia unilateral severa, la agenesia del tálamo, cataratas y defectos de la migración neuronal, incluyendo lisenencefalia y paquigiria.<sup>10</sup>

**GUÍAS de EEUU** Los *Centers for Disease Control and Prevention* (CDC) recomiendan que las mujeres embarazadas pospongan los viajes a cualquier región infectada por el Zika.<sup>18,19</sup> Se debe obtener un historial de viajes de toda mujer embarazada, y las mujeres embarazadas que viajaron a un área afectada por el Zika y que han tenido 2 o más síntomas clínicos de Zika durante las 2 semanas posteriores al viaje, deberían ser sometidas a una prueba a través de las autoridades de salud locales o el CDC, ya que no hay pruebas comerciales. La amniocentesis para el RT-PCR puede ayudar en el diagnóstico y la toma de decisiones.

Donde hay evidencia de potencial exposición materna al Zika, los nacidos vivos deben someterse a una histopatología de la placenta, de la sangre del cordón para RT-PCR, IgM y anticuerpos neutralizantes y PRNT, tanto para Zika como para el dengue. Estudios similares deben obtenerse de tejidos recuperados de fetos abortados. Los niños que sobrevivan deben estudiarse con ecografía transcraneal, evaluaciones oftalmológicas y detección auditiva con evaluaciones repetidas cada 6 meses, incluso si la audición al nacer parece normal.

**EPIDEMIOLOGÍA** El período de incubación en humanos es desconocido, pero en otros primates es de ≈10 días.<sup>9</sup> La infección se amplifica a través de los humanos, estando bien establecida la transmisión mosquito-humano-mosquito. La transmisión perinatal<sup>20</sup> y sexual<sup>21</sup> también ha sido descrita, y el virus es detectable en saliva, orina, semen y leche materna.<sup>22,23</sup> Hay preocupación de que el Zika podría ser transmitido iatrogénicamente a través de productos sanguíneos, aunque no se han reportado este tipo de casos a la fecha.<sup>24</sup>

**DE UN PROBLEMA LOCALIZADO A UNA AMENAZA GLOBAL: ¿QUÉ HAY POR DELANTE?** La agencia de salud de las Naciones Unidas realizó una reunión el 28 de enero de 2016, y la OMS se juntará el 1 de febrero del 2016. La atención global llega tarde para los miles de niños afectados por el Zika. Bogoch et al<sup>7</sup> usó el hábitat de *Aedes* y el volumen de viaje aéreo para modelar el riesgo de expansión del Zika desde América Latina al resto de América y concluyó que 22,7 millones de personas en los Estados Unidos viven en regiones con una posible transmisión a un año. Estas son burdas subestimaciones si los reportes no confirmados en Brasil del

28 de enero del 2016 sobre la transmisión del Zika por el *Culex* se sostienen.<sup>25</sup> Los mosquitos *Culex*, que también portan el Virus del Nilo Oeste, son 20 veces más comunes que *Aedes* y están distribuidos ampliamente en América del Norte. Este problema de salud global puede pronto convertirse en muy local para los neurólogos pediatras y neonatólogos de los EE UU.

## FONDOS PARA EL ESTUDIO

Sin fondos reportados.

## DECLARACIÓN DE INTERESES

G. Birbeck ha recibido apoyo para investigación del NIH (R01NS074409; R21NS073509) y la Dana Foundation y recibe honorarios por su editorial para *Neurology*. Ir a [Neurology.org](http://Neurology.org) para declaraciones completas.

## BIBLIOGRAFÍA

1. McCarthy M. First US case of Zika virus infection identified in Texas. *BMJ* 2016;352:i212.
2. Garcia-Navarro L. Zika virus likely affected her baby, and she feels Brazil doesn't care. Morning Edition. Published January 20, 2016. Available at: <http://www.npr.org/sections/goatsandsoda/2016/01/20/463620717/zika-virus-likely-affected-her-baby-and-she-feels-brazil-doesnt-care>. Accessed February 17, 2016.
3. Dyer O. Jamaica advises women to avoid pregnancy as Zika virus approaches. *BMJ* 2016;352:i383.
4. Dyer O. Sixty seconds on...Zika virus. *BMJ* 2016;352:i467.
5. Fauci AS, Morens DM. Zika virus in the Americas: yet another arbovirus threat. *N Engl J Med Epub* 2016 Jan 13.
6. Enfissi A, Codrington J, Roosblad J, Kazanji M, Rousset D. Zika virus genome from the Americas. *Lancet* 2016;387:227–228.
7. Bogoch II, Brady OJ, Kraemer MU, et al. Anticipating the international spread of Zika virus from Brazil. *Lancet* 2016;387:335–336.
8. Triunfol M. A new mosquito-borne threat to pregnant women in Brazil. *Lancet Infect Dis Epub* 2015 Dec 23.
9. Hayes EB. Zika virus outside Africa. *Emerg Infect Dis* 2009;15:1347–1350.
10. CDC. Zika Virus. 2016. Available at: <http://www.cdc.gov/zika/prevention/index.html>. Accessed January 31, 2015.
11. RSTMH. Zika Virus First Described in Transactions! 2016. Available at: <https://rstmh.org/blog/2016/jan/26/zika-virus-first-described-transactions>.
12. Ioos S, Mallet HP, Leparç Goffart I, Gauthier V, Cardoso T, Herida M. Current Zika virus epidemiology and recent epidemics. *Med Mal Infect* 2014;44:302–307.
13. Dick GW. Zika virus: II: pathogenicity and physical properties. *Trans R Soc Trop Med Hyg* 1952;46:521–534.
14. Dick GW, Kitchen SF, Haddock AJ. Zika virus: I: isolations and serological specificity. *Trans R Soc Trop Med Hyg* 1952;46:509–520.
15. Tetro JA. Zika and microcephaly: causation, correlation, or coincidence? *Microbes Infect. Epub* 2016 Jan 14.
16. Oehler E, Watrin L, Larre P, et al. Zika virus infection complicated by Guillain-Barre syndrome: case report, French Polynesia, December 2013. *Euro Surveill* 2014;19.
17. ECDC. Rapid Risk Assessment, Zika Virus Outbreak, French Polynesia. Solna, Sweden: European Centre for Disease Prevention and Control; 2014.
18. Petersen EE, Staples JE, Meaney-Delman D, et al. Interim guidelines for pregnant women during a Zika virus outbreak: United States, 2016. *MMWR Morb Mortal Wkly Rep* 2016;65:30–33.

19. Staples JE, Dziuban EJ, Fischer M, et al. Interim guidelines for the evaluation and testing of infants with possible congenital Zika virus infection: United States, 2016. *MMWR Morb Mortal Wkly Rep* 2016;65:63–67.
20. Besnard M, Lastere S, Teissier A, Cao-Lormeau V, Musso D. Evidence of perinatal transmission of Zika virus, French Polynesia, December 2013 and February 2014. *Euro Surveill* 2014;19. pii: 20751.
21. Musso D, Roche C, Robin E, Nhan T, Teissier A, Cao-Lormeau VM. Potential sexual transmission of Zika virus. *Emerg Infect Dis* 2015;21:359–361.
22. Musso D, Nilles EJ, Cao-Vorreau C. Rapid spread of emerging Zika virus in the Pacific area. *Clin Microbiol Infect* 2014;20:O595–O596.
23. Musso D. Zika virus transmission from French Polynesia to Brazil. *Emerg Infect Dis* 2015;21:1887.
24. Marano G, Pupella S, Vaglio S, Liumbruno GM, Grazzini G. Zika virus and the never-ending story of emerging pathogens and transfusion medicine. *Blood Transfus* 2015:1–6.
25. Crawford A. Zika Virus may have spread to common mosquito. *SkyNews* 2016.
